# Supplementary material for: Imidazo[1,5-a]pyridine-1-ylalkylalcohols: synthesis via intramolecular cyclization of N-thioacyl 1,2-aminoalcohols and their silyl ethers and molecular structures
Source: Royal Society of Chemistry journal article supplement (doi:10.1039/c2ob25438g), 2012-01-01
Supplement: c2ob25438g.pdf [file c2ob25438g.pdf]

## Supplementary Information

Imidazo[1,5-*a*]pyridine-1-ylalkylalcohols: synthesis via intramolecular cyclization of  
*N*-thioacyl 1,2-aminoalcohols and their silyl ethers and molecular structures<sup>†</sup>

Toshiaki Murai, Eri Nagaya, Fumitoshi Shibahara and Toshifumi Maruyama  
*Department of Chemistry, Faculty of Engineering, Gifu University, Yanagido, Gifu*  
*501-1193, Japan*

**X-ray Structure Analyses.** The measurement of **8a**, **2e** and **9g** was carried out on a Rigaku/MSM Mercury CCD diffractometer with graphite-monochromated Mo-K $\alpha$  radiation ( $\lambda = 0.71069 \text{ \AA}$ ). Reflection data were collected at 123–203 K using a Rigaku XR-TCS-2-050 temperature controller. The structure was solved by direct methods (SIR97)<sup>S1)</sup> and refined by full-matrix least-squares procedures (SHELXL-97)<sup>S2)</sup> using the Yadokari-XG 2009<sup>S3)</sup>. The X-ray quality crystal was obtained by slow diffusion of hexane into CH<sub>2</sub>Cl<sub>2</sub> solution of **8a**, **2e** and **9g**. The crystal was cut from the grown crystals and was attached to the tip of a MiTeGen MicroMount™. Crystal data and measurement description are summarized in Tables S1–S3.

#### References

- S1) A. Altomare, M. C. Burla, M. Camalli, G. L. Cascarano, C. Giacovazzo, A. Guagliardi, A. G. G. Moliterni, G. Polidori and R. Spagna, *J. Appl. Cryst.*, 1999, **32**, 115.
- S2) G. M. Sheldrick, SHELXL-97, *A Program for the Refinement of Crystal Structures*; University of Göttingen: Göttingen, Germany, 1997.
- S3) (a) K. Wakita, Yadokari-XG, *Software for Crystal Structure Analyses*, 2001; (b) C. Kabuto, S. Akine, T. Nemoto, E. Kwon, *J. Cryst. Soc. Jpn.*, 2009, **51**, 218.

**Table S1.** Crystal data and structure refinement for **8a**.

|                                                   |                                                |                  |
|---------------------------------------------------|------------------------------------------------|------------------|
| Identification code                               | en013-3                                        |                  |
| Empirical formula                                 | C <sub>41</sub> H <sub>32</sub> N <sub>4</sub> |                  |
| Formula weight                                    | 580.71                                         |                  |
| Temperature                                       | 153(2) K                                       |                  |
| Wavelength                                        | 0.71070 Å                                      |                  |
| Crystal system                                    | Monoclinic                                     |                  |
| Space group                                       | C2/c                                           |                  |
| Unit cell dimensions                              | a = 22.232(18) Å                               | α = 90°.         |
|                                                   | b = 10.636(7) Å                                | β = 133.986(7)°. |
|                                                   | c = 17.824(14) Å                               | γ = 90°.         |
| Volume                                            | 3032(4) Å <sup>3</sup>                         |                  |
| Z                                                 | 4                                              |                  |
| Density (calculated)                              | 1.272 Mg/m <sup>3</sup>                        |                  |
| Absorption coefficient                            | 0.075 mm <sup>-1</sup>                         |                  |
| F(000)                                            | 1224                                           |                  |
| Crystal size                                      | 0.29 x 0.17 x 0.03 mm <sup>3</sup>             |                  |
| Theta range for data collection                   | 3.12 to 27.48°.                                |                  |
| Index ranges                                      | -28 ≤ h ≤ 22, -13 ≤ k ≤ 11, -23 ≤ l ≤ 22       |                  |
| Reflections collected                             | 12275                                          |                  |
| Independent reflections                           | 3463 [R(int) = 0.0766]                         |                  |
| Completeness to $\theta = 27.48^\circ$            | 99.7 %                                         |                  |
| Absorption correction                             | Integration                                    |                  |
| Max. and min. transmission                        | 0.998 and 0.988                                |                  |
| Refinement method                                 | Full-matrix least-squares on F <sup>2</sup>    |                  |
| Data / restraints / parameters                    | 3463 / 0 / 205                                 |                  |
| Final R indices [ $I > 2\sigma(I)$ ] <sup>a</sup> | R1 = 0.1049, wR2 = 0.1825                      |                  |
| R indices (all data) <sup>b</sup>                 | R1 = 0.1551, wR2 = 0.2078                      |                  |
| Goodness-of-fit on F <sup>2</sup> <sup>c</sup>    | 1.000                                          |                  |
| Largest diff. peak and hole                       | 0.305 and -0.182 e.Å <sup>-3</sup>             |                  |

<sup>a</sup>  $R1 = \sum ||F_o| - |F_c|| / \sum |F_o|$ . <sup>b</sup>  $wR2 = [\sum \{w(F_o^2 - F_c^2)^2\} / \sum w(F_o^2)^2]^{1/2}$ ,  $w = 1/[\sigma^2 F_o^2 + (aP)^2 + bP]$  (a and b are constants suggested by the refinement program;  $P = [\max(F_o^2, 0) + 2F_c^2]/3$ ). <sup>c</sup>  $GOF = [\sum w(F_o^2 - F_c^2)^2 / (N_{obs} - N_{params})]^{1/2}$ .

**Table S2.** Crystal data and structure refinement for **2e**.

|                                                       |                                                    |          |
|-------------------------------------------------------|----------------------------------------------------|----------|
| Identification code                                   | en091                                              |          |
| Empirical formula                                     | C <sub>18</sub> H <sub>14</sub> N <sub>4</sub> O   |          |
| Formula weight                                        | 302.33                                             |          |
| Temperature                                           | 203(2) K                                           |          |
| Wavelength                                            | 0.71070 Å                                          |          |
| Crystal system                                        | Orthorhombic                                       |          |
| Space group                                           | <i>Pna2<sub>1</sub></i>                            |          |
| Unit cell dimensions                                  | a = 25.97(2) Å                                     | α = 90°. |
|                                                       | b = 4.887(4) Å                                     | β = 90°. |
|                                                       | c = 11.168(9) Å                                    | γ = 90°. |
| Volume                                                | 1417.7(19) Å <sup>3</sup>                          |          |
| Z                                                     | 4                                                  |          |
| Density (calculated)                                  | 1.417 Mg/m <sup>3</sup>                            |          |
| Absorption coefficient                                | 0.092 mm <sup>-1</sup>                             |          |
| F(000)                                                | 632                                                |          |
| Crystal size                                          | 0.29 x 0.26 x 0.14 mm <sup>3</sup>                 |          |
| Theta range for data collection                       | 4.24 to 27.50°.                                    |          |
| Index ranges                                          | -33 ≤ h ≤ 33, -6 ≤ k ≤ 4, -10 ≤ l ≤ 14             |          |
| Reflections collected                                 | 10824                                              |          |
| Independent reflections                               | 1684 [R(int) = 0.0755]                             |          |
| Completeness to z = 27.50°                            | 98.0 %                                             |          |
| Absorption correction                                 | Integration                                        |          |
| Max. and min. transmission                            | 0.989 and 0.975                                    |          |
| Refinement method                                     | Full-matrix least-squares on <i>F</i> <sup>2</sup> |          |
| Data / restraints / parameters                        | 1684 / 1 / 209                                     |          |
| Final R indices [I > 2σ(I)] <sup>a</sup>              | R1 = 0.0522, wR2 = 0.1140                          |          |
| R indices (all data) <sup>b</sup>                     | R1 = 0.0532, wR2 = 0.1145                          |          |
| Absolute structure parameter                          | 0(10)                                              |          |
| Goodness-of-fit on <i>F</i> <sup>2</sup> <sup>c</sup> | 1.000                                              |          |
| Largest diff. peak and hole                           | 0.372 and -0.214 e.Å <sup>-3</sup>                 |          |

<sup>a</sup>  $R1 = \frac{\sum ||F_o| - |F_c||}{\sum |F_o|}$ . <sup>b</sup>  $wR2 = [\frac{\sum \{w(F_o^2 - F_c^2)^2\}}{\sum w(F_o^2)^2}]^{1/2}$ ,  $w = 1/[\sigma^2 F_o^2 + (aP)^2 + bP]$  (a and b are constants suggested by the refinement program;  $P = [\max(F_o^2, 0) + 2F_c^2]/3$ ). <sup>c</sup>  $GOF = [\frac{\sum w(F_o^2 - F_c^2)^2}{(N_{obs} - N_{params})}]^{1/2}$ .

**Table S3.** Crystal data and structure refinement for **9g•CH<sub>2</sub>Cl<sub>2</sub>**.

|                                                           |                                                                  |                  |
|-----------------------------------------------------------|------------------------------------------------------------------|------------------|
| Identification code                                       | en064-2                                                          |                  |
| Empirical formula                                         | C <sub>28</sub> H <sub>22</sub> Cl <sub>2</sub> N <sub>2</sub> O |                  |
| Formula weight                                            | 473.38                                                           |                  |
| Temperature                                               | 203(2) K                                                         |                  |
| Wavelength                                                | 0.71070 Å                                                        |                  |
| Crystal system                                            | Monoclinic                                                       |                  |
| Space group                                               | <i>P</i> 2 <sub>1</sub> / <i>n</i>                               |                  |
| Unit cell dimensions                                      | a = 8.513(2) Å                                                   | α = 90°.         |
|                                                           | b = 23.170(6) Å                                                  | β = 103.189(3)°. |
|                                                           | c = 11.837(3) Å                                                  | γ = 90°.         |
| Volume                                                    | 2273.1(11) Å <sup>3</sup>                                        |                  |
| Z                                                         | 4                                                                |                  |
| Density (calculated)                                      | 1.383 Mg/m <sup>3</sup>                                          |                  |
| Absorption coefficient                                    | 0.310 mm <sup>-1</sup>                                           |                  |
| F(000)                                                    | 984                                                              |                  |
| Crystal size                                              | 0.34 x 0.34 x 0.23 mm <sup>3</sup>                               |                  |
| Theta range for data collection                           | 3.02 to 27.50°.                                                  |                  |
| Index ranges                                              | -11 ≤ h ≤ 11, -29 ≤ k ≤ 30, -15 ≤ l ≤ 13                         |                  |
| Reflections collected                                     | 18043                                                            |                  |
| Independent reflections                                   | 5151 [R(int) = 0.0297]                                           |                  |
| Completeness to z = 27.50°                                | 98.7 %                                                           |                  |
| Absorption correction                                     | Integration                                                      |                  |
| Max. and min. transmission                                | 0.986 and 0.970                                                  |                  |
| Refinement method                                         | Full-matrix least-squares on <i>F</i> <sup>2</sup>               |                  |
| Data / restraints / parameters                            | 5151 / 0 / 301                                                   |                  |
| Final R indices [ <i>I</i> > 2σ( <i>I</i> )] <sup>a</sup> | <i>R</i> 1 = 0.0587, <i>wR</i> 2 = 0.1159                        |                  |
| R indices (all data) <sup>b</sup>                         | <i>R</i> 1 = 0.0637, <i>wR</i> 2 = 0.1189                        |                  |
| Goodness-of-fit on <i>F</i> <sup>2</sup> <sup>c</sup>     | 1.000                                                            |                  |
| Largest diff. peak and hole                               | 0.605 and -0.662 e.Å <sup>-3</sup>                               |                  |

<sup>a</sup>  $R1 = \sum ||F_o| - |F_c|| / \sum |F_o|$ . <sup>b</sup>  $wR2 = [\sum \{w(F_o^2 - F_c^2)^2\} / \sum w(F_o^2)^2]^{1/2}$ ,  $w = 1/[\sigma^2 F_o^2 + (aP)^2 + bP]$  (a and b are constants suggested by the refinement program;  $P = [\max(F_o^2, 0) + 2F_c^2]/3$ ). <sup>c</sup>  $GOF = [\sum w(F_o^2 - F_c^2)^2 / (N_{obs} - N_{params})]^{1/2}$ .
